# Supplementary material
Source: publisher figshare collection journal article supplement (https://tandf.figshare.com/ndownloader/files/16350368)
Supplement: Supplementary file 1 [file 16350368]

Experimental and theoretical approaches on the reaction mechanism and kinetics of dimethyl 2-(6-oxopyridazin-1(6H)-yl)fumarate: micelle and salt effects

Yaser Shahbakhsh, Sayyed Mostafa Habibi-Khorasani*, Mehdi Shahraki

Department of Chemistry, Faculty of Science, University of Sistan and Baluchestan, P O Box 98135-674, Zahedan, Iran

E-mail: smhabibi@chem.usb.ac.ir

**Supplemental Materials**

Rate law derivation in the absence of SDS according to the proposed mechanism (**Figure S ­­­­­­­8**):

*Step4 is RDS and steps 1 and 3 are in equilibrium state*

Rate = k4[I3]

steady state approximation

can be neglected, So

So, the following expression can be written

Because the first step is fast then k-1>>k2 [2] and according to assumption of k4 as RDS, step k-3 >> k4 so the (rate)mech law can be introduced as the following expression:

And we have:

So:

Rate law derivation in the presence of SDS (**Figure S 14**):

*Step5 is RDS and steps 1 and 4 are in equilibrium state*

Rate = k5[I4]

steady state approximation

can be neglected, So

So, the following expression can be written

Because the first step is fast then k-1>>k2[2] and according to assumption of RDS for step5, k-4 >> k5  so:

and

So we have:

(Rate)mech = kobs[1][2]

***Pseudo order condition for partial orders determination***


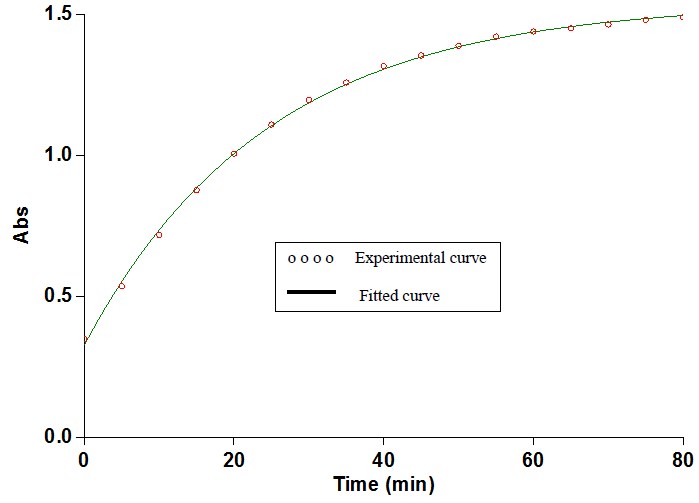


**Figure S 1.** First order fit on the reaction among **(1), (2)** and **(3)** when **(2)** is in excess and **(3)** is catalyst.


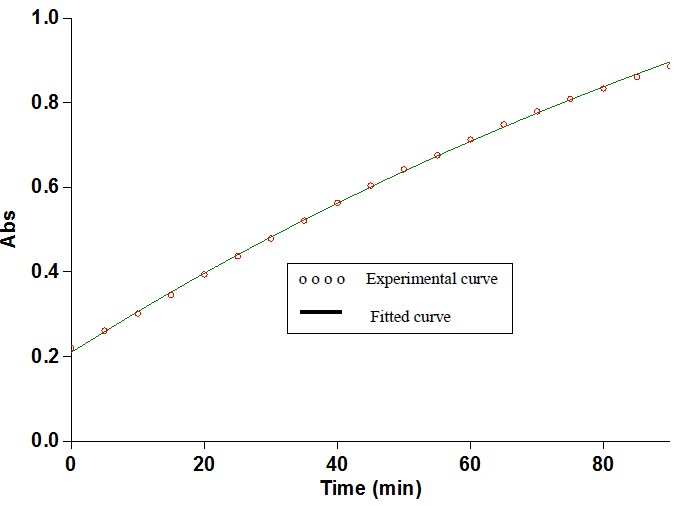


**Figure S 2.** First order fit on the reaction among **(1), (2)** and **(3)** when **(1)** is in excess and **(3)** is catalyst

***Change in absorbance during the time in ethanol solvent***


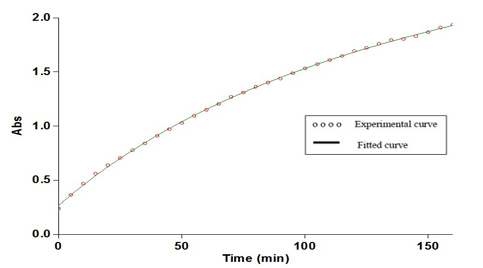


**Figure S 3.** Second order fitting curve (solid line) for product absorbance versus time at 360 nm wavelength in ethanol at 28°C in the reaction between 10-2 M of **(1)**, 10-2 M of **(2)** in the presence of 5×10-3 M of **(3).**

The effect of temperature and activation parameters determination

**Figure S 4.** Dependence of ln k on reciprocal temperature for the reaction among **(1), (2)** and **(3)** in order to evaluate Ea/R from the slope according to the Arrhenius equation

**Figure S 5.** Dependence of ln k/T on reciprocal temperature for the reaction among **(1), (2)** and **(3)** in order to evaluate activation parameters (ΔH‡ and ΔS‡, respectively) from the slope and intercept according to the Eyring equation (8)

**Figure S 6.** Dependence of Tlnk/T on reciprocal temperature for the reaction among **(1), (2)** and **(3)** in order to evaluate activation parameters (ΔS‡ and ΔH‡, respectively) from the slope and intercept, according to the linearized form of the Eyring equation (9).

**Salt effect on the reaction rate**


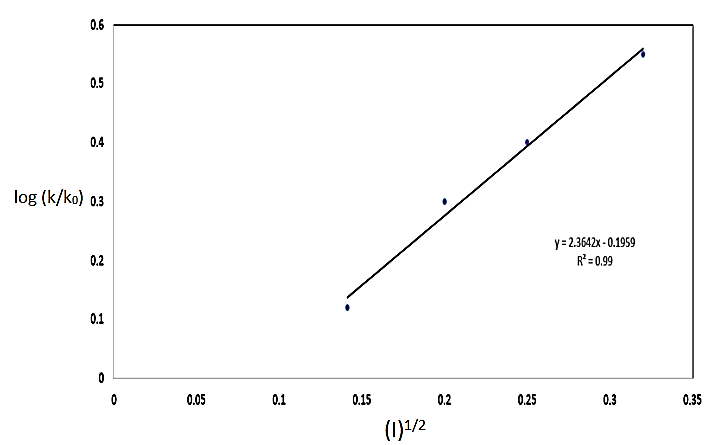


**Figure S 7.** Rate constant dependence on ionic strength (*I*) of NaBr for the reaction among reactants **(1), (2)** and **(3)** in methanol solvent at 28°C


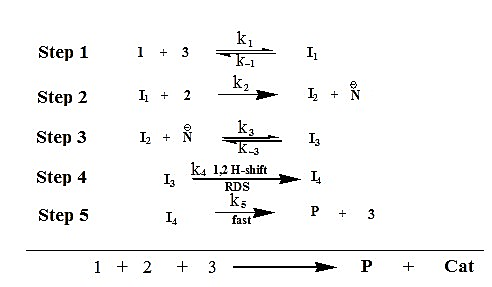


**Figure S 8**. Simplified form of the speculative mechanism for the reaction among **(1), (2)** and **(3)** in the absence of SDS.

**The effect of SDS on the reaction**


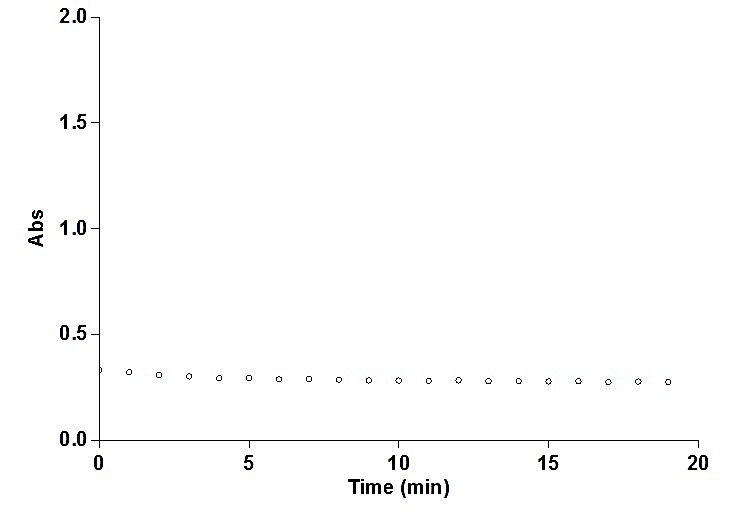


**Figure S 9.** No reaction between DMAD (1) and SDS (micelle)


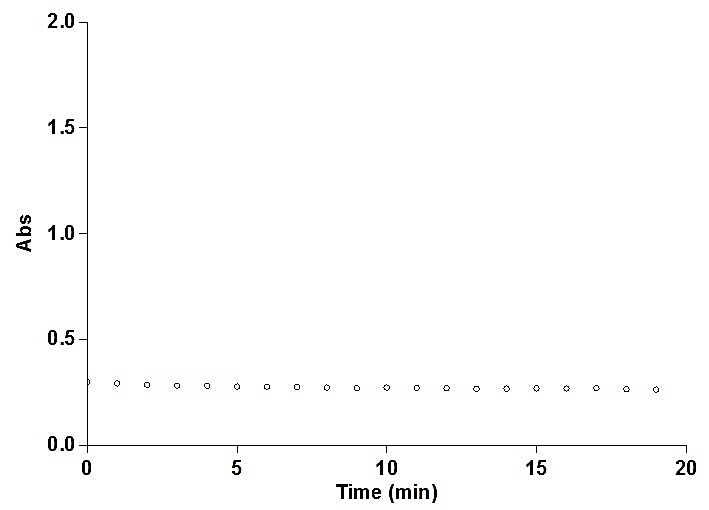


**Figure S 10.** No reaction between 3-(2H) pyridazinone (2) and SDS (micelle)


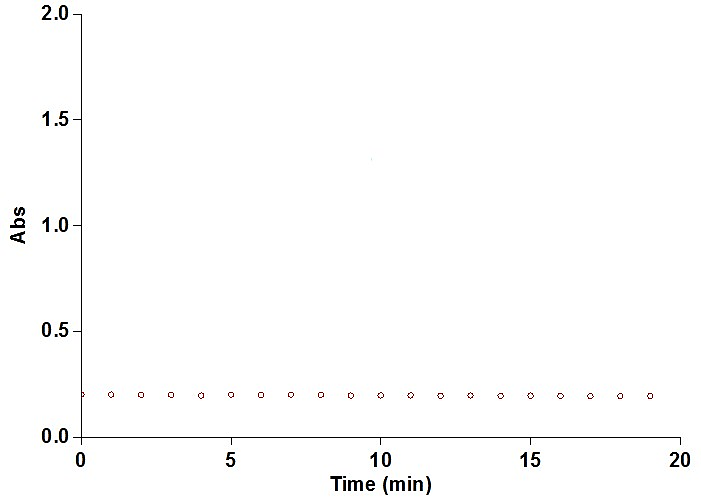


**Figure S 11.** No reaction between AsPh3 (3) and SDS (micelle)


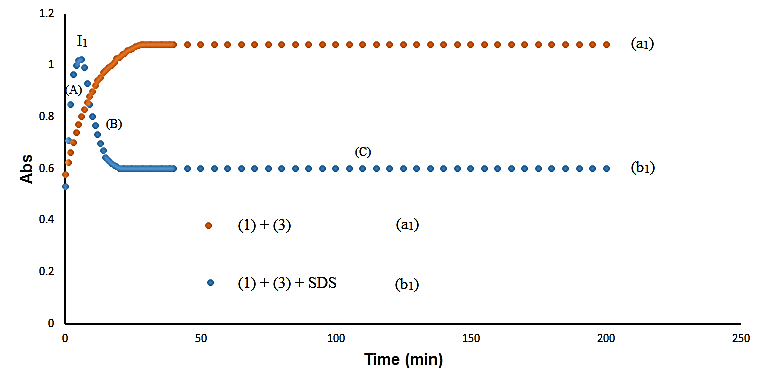


**Figure S 12.** The reaction between DMAD **(1)** and AsPh3 **(3)** in the presence of SDS, spectrum (b1) and in the absence of SDS, spectrum (a1).


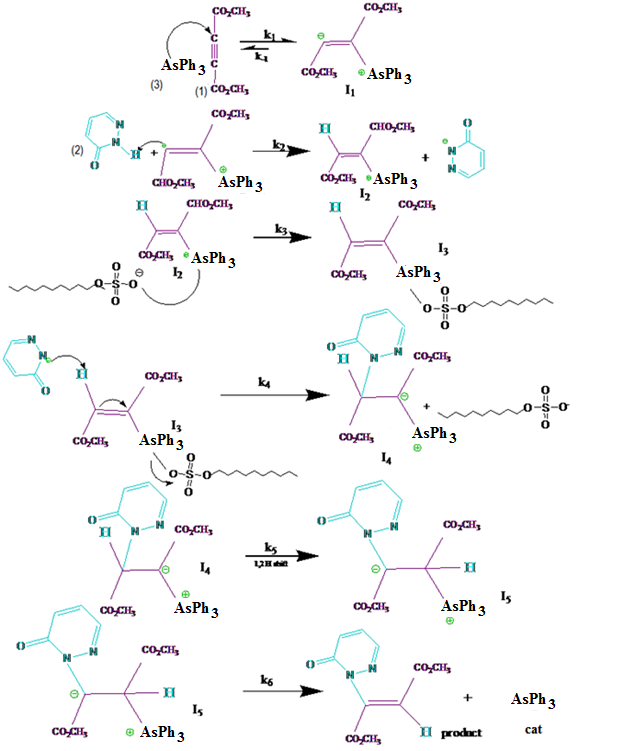


**Figure S 13.** Speculative mechanism for the reaction among **(1), (2)** and **(3)** in the presence of SDS.


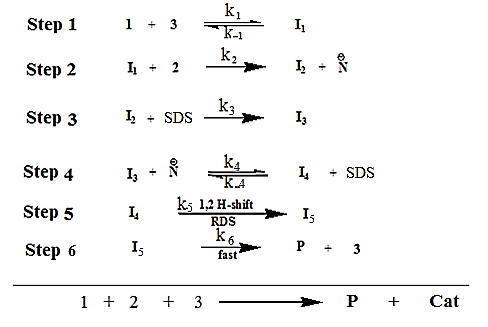


**Figure S 14.** Simplified form of the speculative mechanism of the reaction among **(1), (2)** and **(3)** in the presence of SDS.

**Computational study**


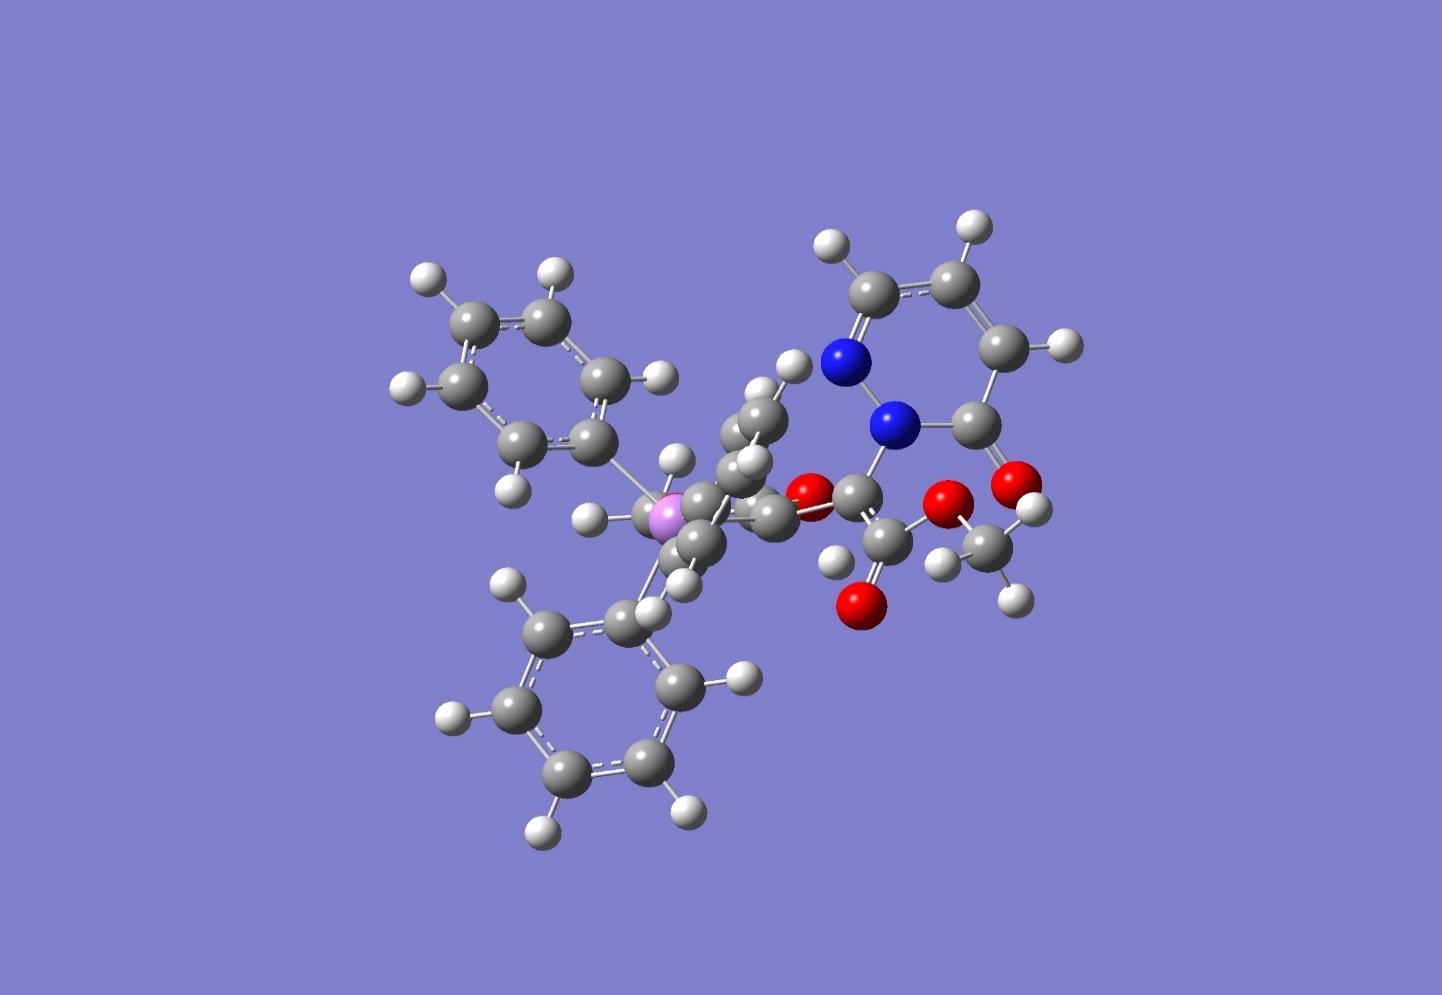


**Figure S 15.** T.S structure (T.S4) in step4 optimized by DFT method at the B3LYP/6-31+G(2d,p) level of theory in gas phase

**Table S 1.** Volume quantities (μL) of reactants **(1), (2)** and **(3)** that have been used to satisfy Job’s plot.

| reactants |  |  | Volume (μL) |  |  |  |
| --- | --- | --- | --- | --- | --- | --- |
| **(1)** | 1000 | 800 | 600 | 400 | 200 | 0 |
| **(2)** | 0 | 100 | 200 | 300 | 400 | 500 |
| **(3)** | 0 | 100 | 200 | 300 | 400 | 500 |

**Table S 2.** Comparison between the experimental rate law (Rate)exp and the derived rate law (Rate)mech law when each step (step1 , step2 , step3,  step4,  step5) has been considered as RDS.

| RDS step | Equilibrium step(s) | (Rate)mech | kobs | ( Rate)exp |
| --- | --- | --- | --- | --- |
| 1 | 1 | kobs[1] | k1[3] | kobs[1][2] |
| 2 | 1 | kobs[1][2] |  | kobs[1][2] |
| 3 | 1&2 |  |  | kobs[1][2] |
| 4 | 1&3 | kobs[1][2] |  | kobs[1][2] |
| 5 | 1&4 | kobs[1][2] |  | kobs[1][2] |

**Table S 3.** The first stretching frequencies (cm-1) for the steps 2 and 4 of the reaction mechanism calculated by DFT method at B3LYP/6-31+G(2d,p) level of theory in gas phase

| Step2 | first stretching frequency (cm-1) | Step 4 | first stretching frequency (cm-1) |
| --- | --- | --- | --- |
| I1 | 9.25 | I3 | 17.55 |
| T.S2 | -906.61 | T.S4 | -1548.63 |
| I2 | 17.67 | P | 6.66 |
